# Supplementary material for: Phenotyping of lymphoproliferative tumours generated in xenografts of non-small cell lung cancer
Source: PubMed Central journal article supplement (PMC10277614; doi:10.3389/fonc.2023.1156743), 2023-06-05

IHC outcome: Lymphoproliferation. Patient diagnosis: Squamous cell carcinoma.

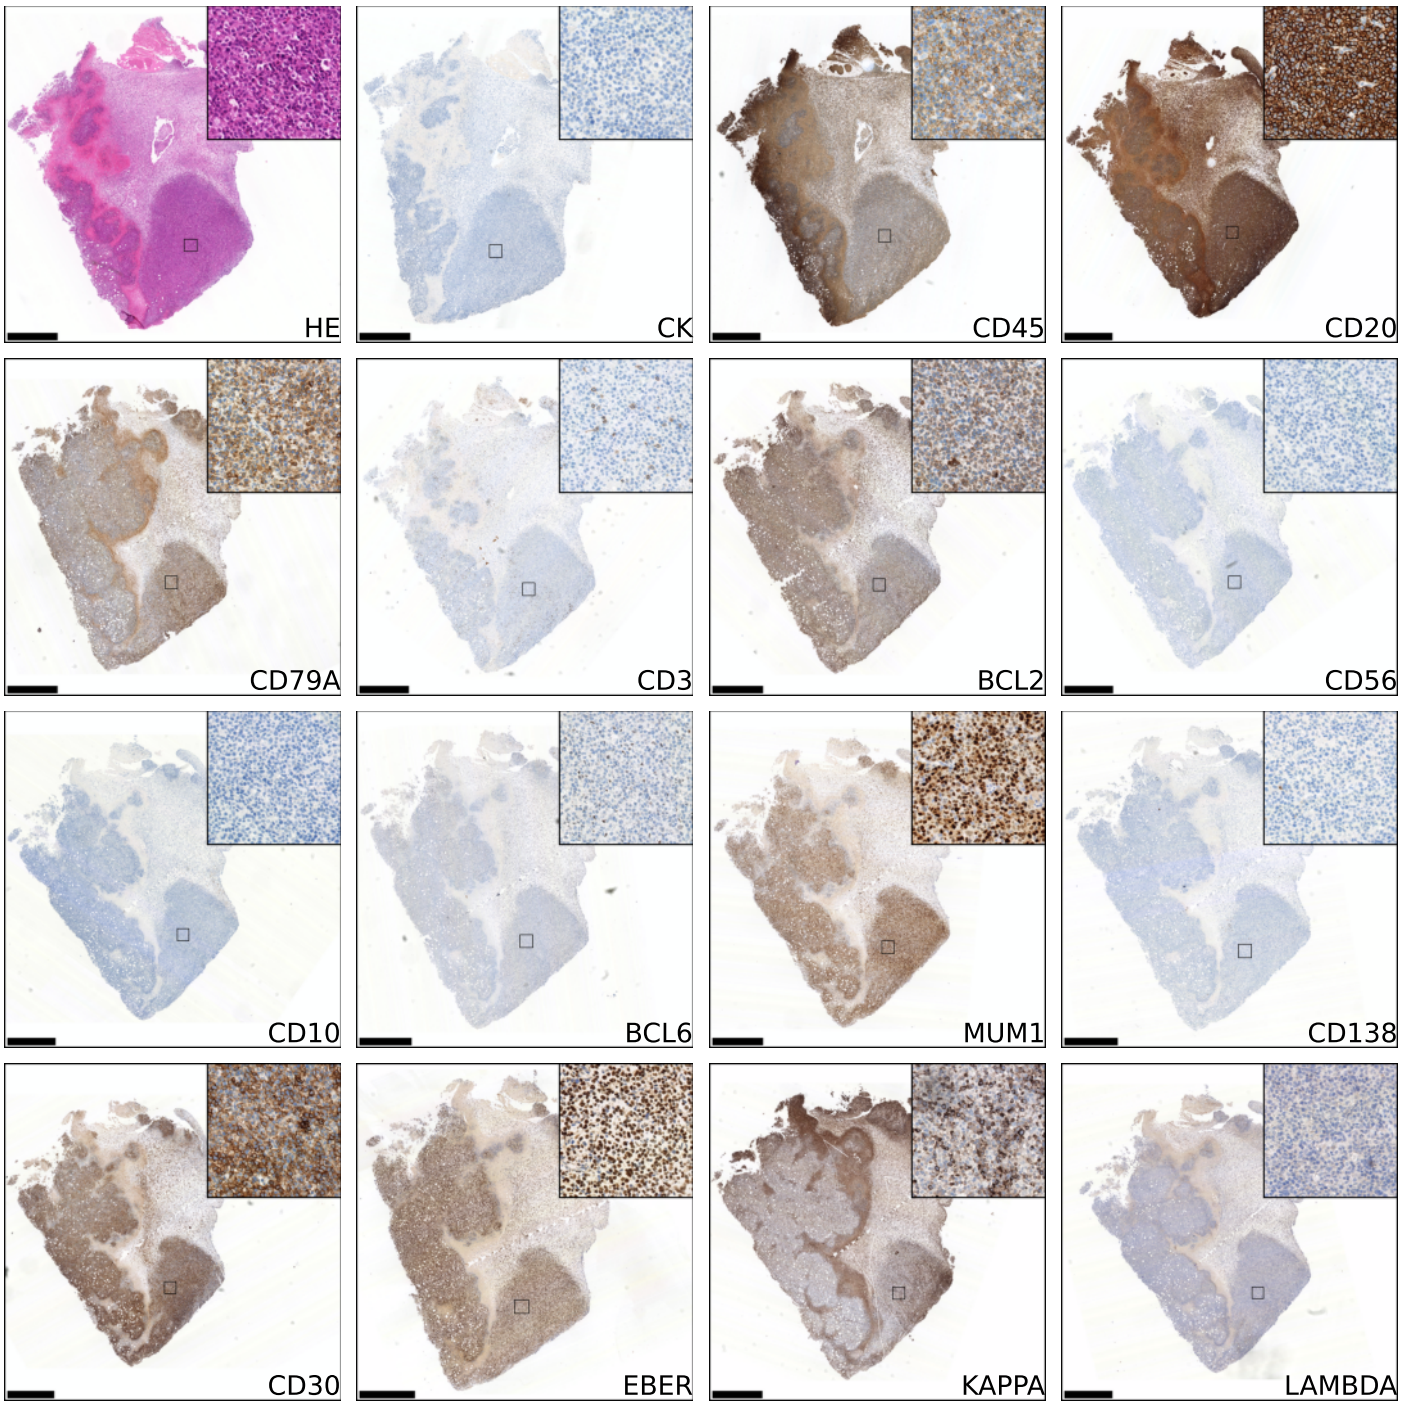



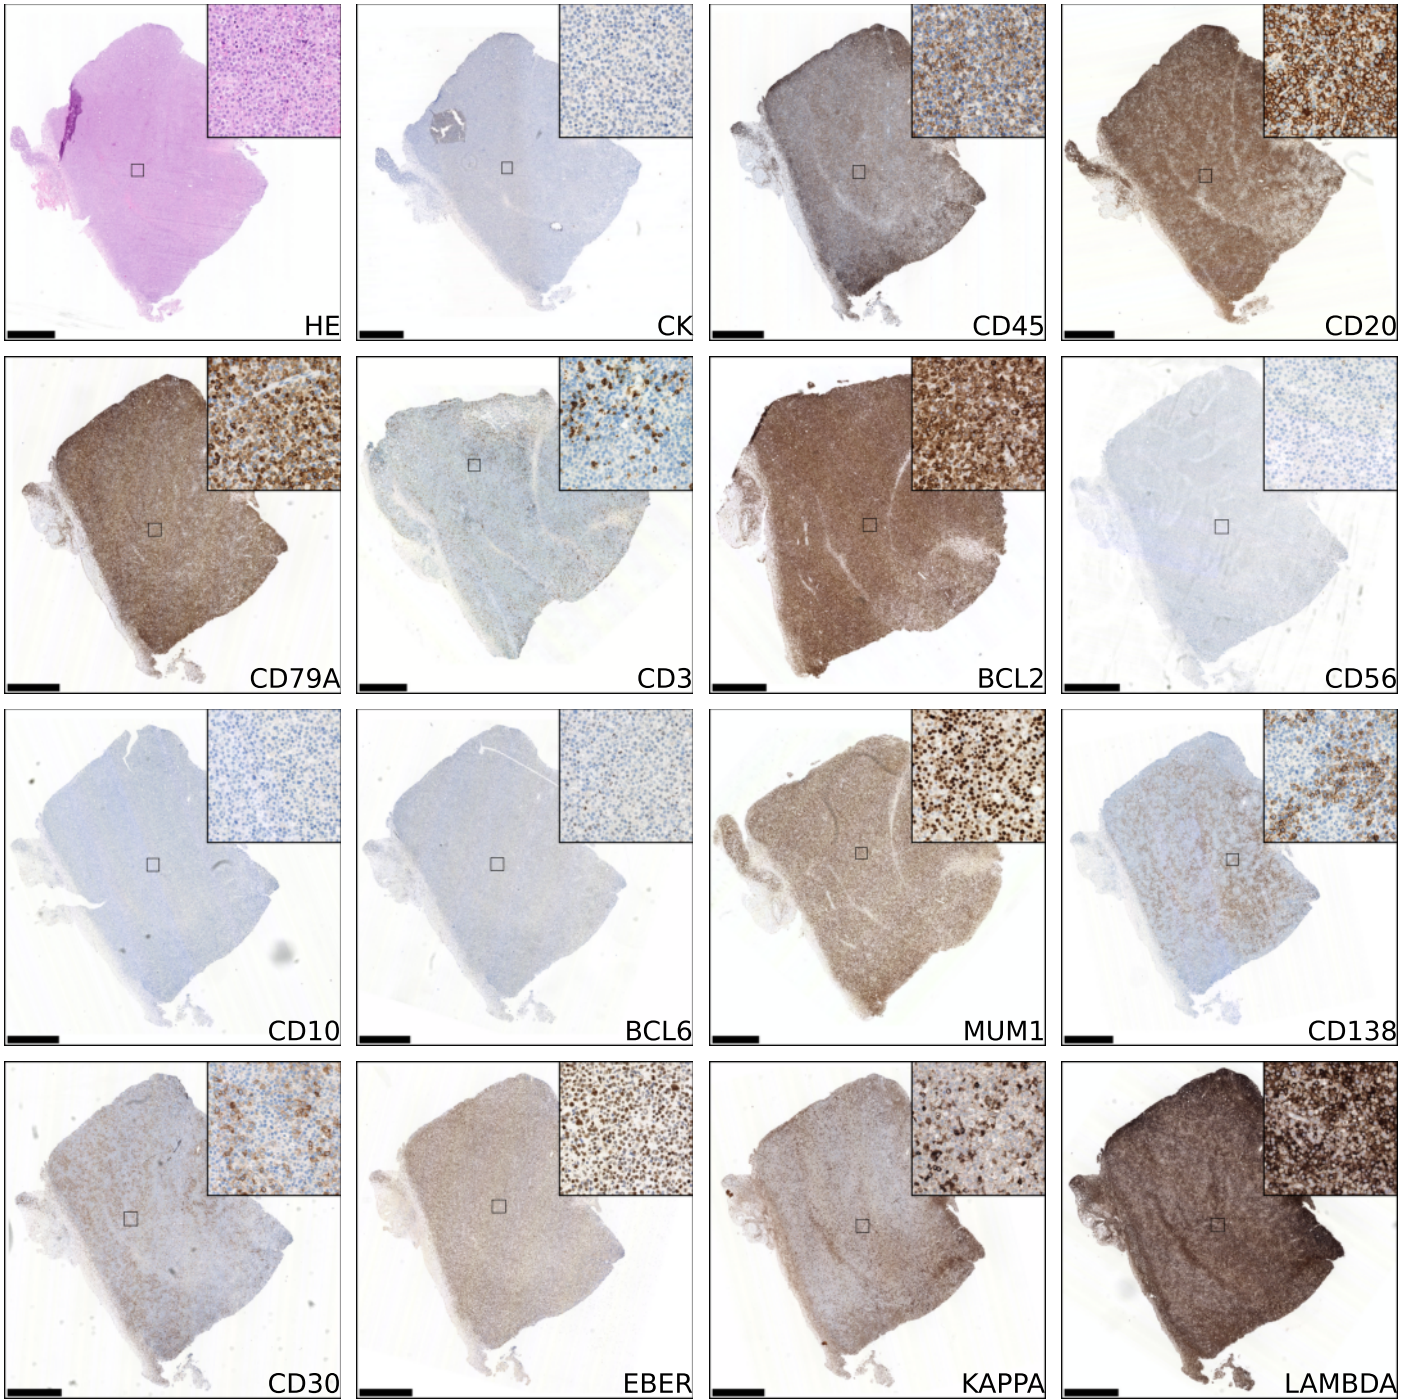



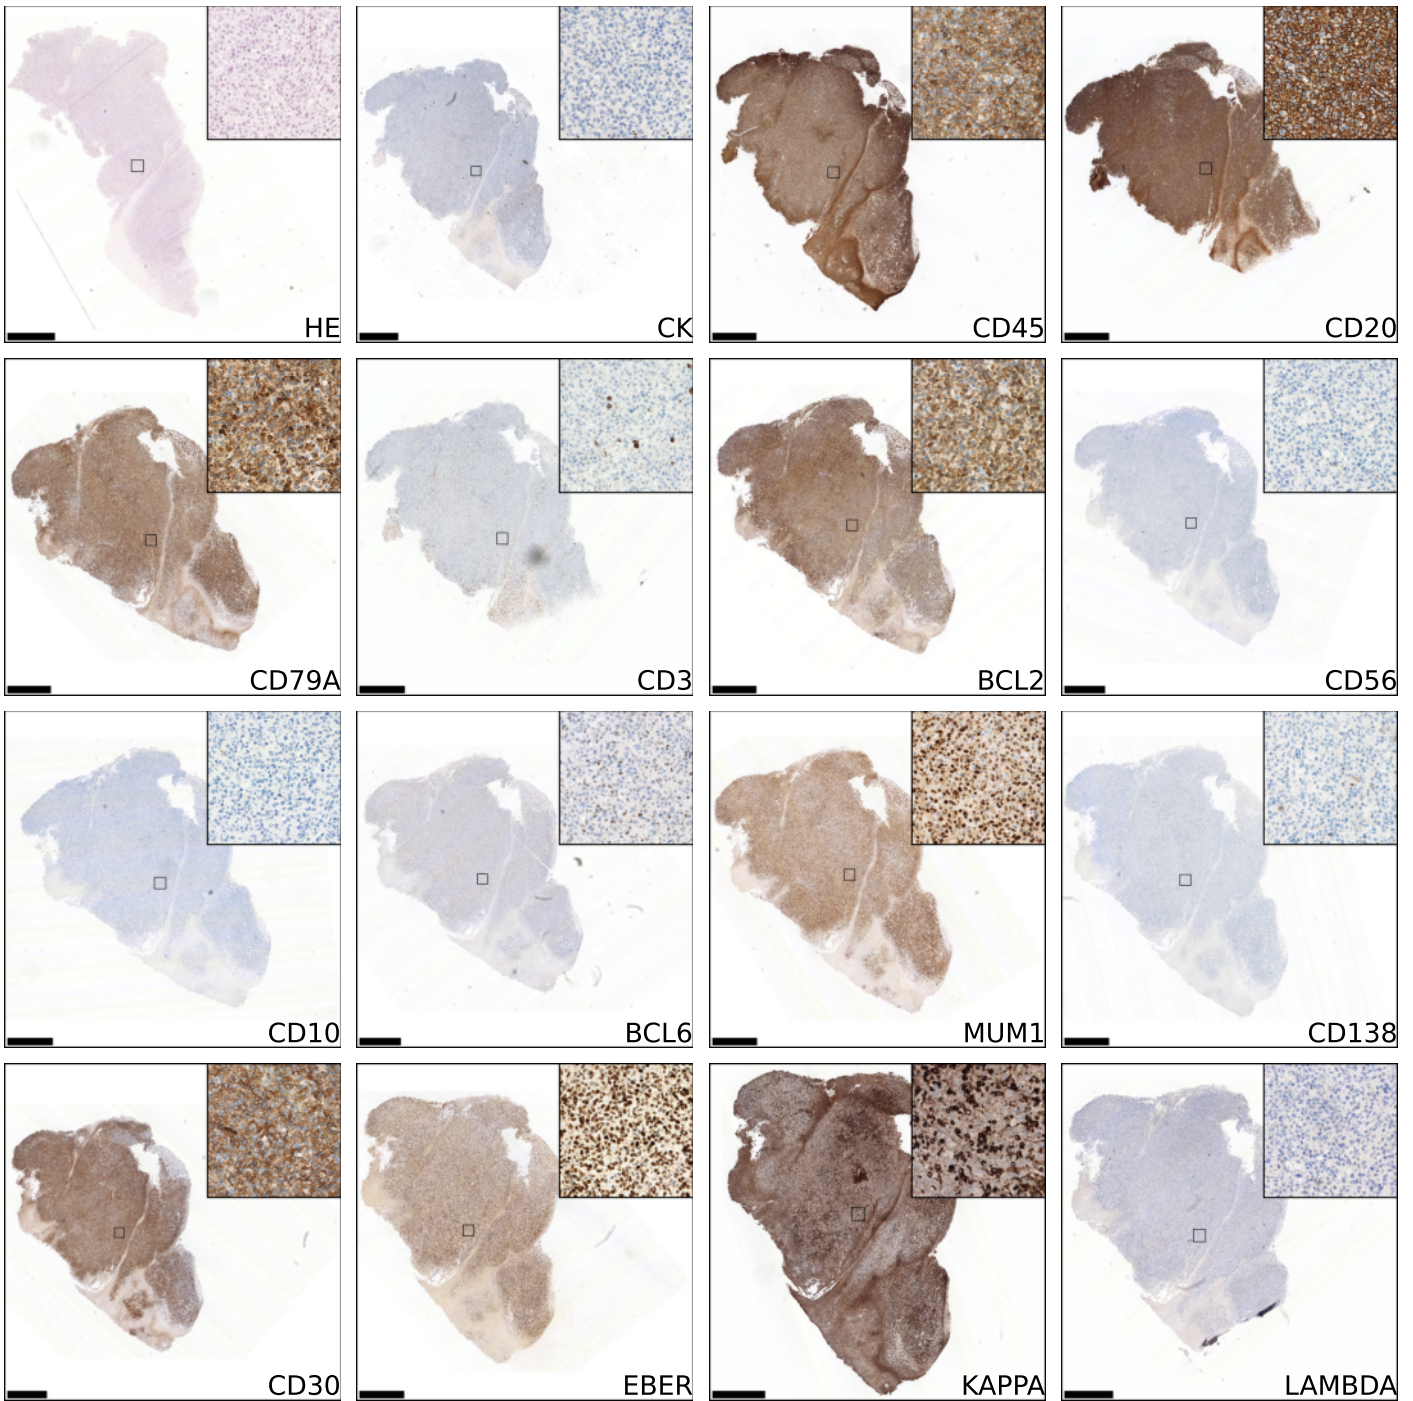

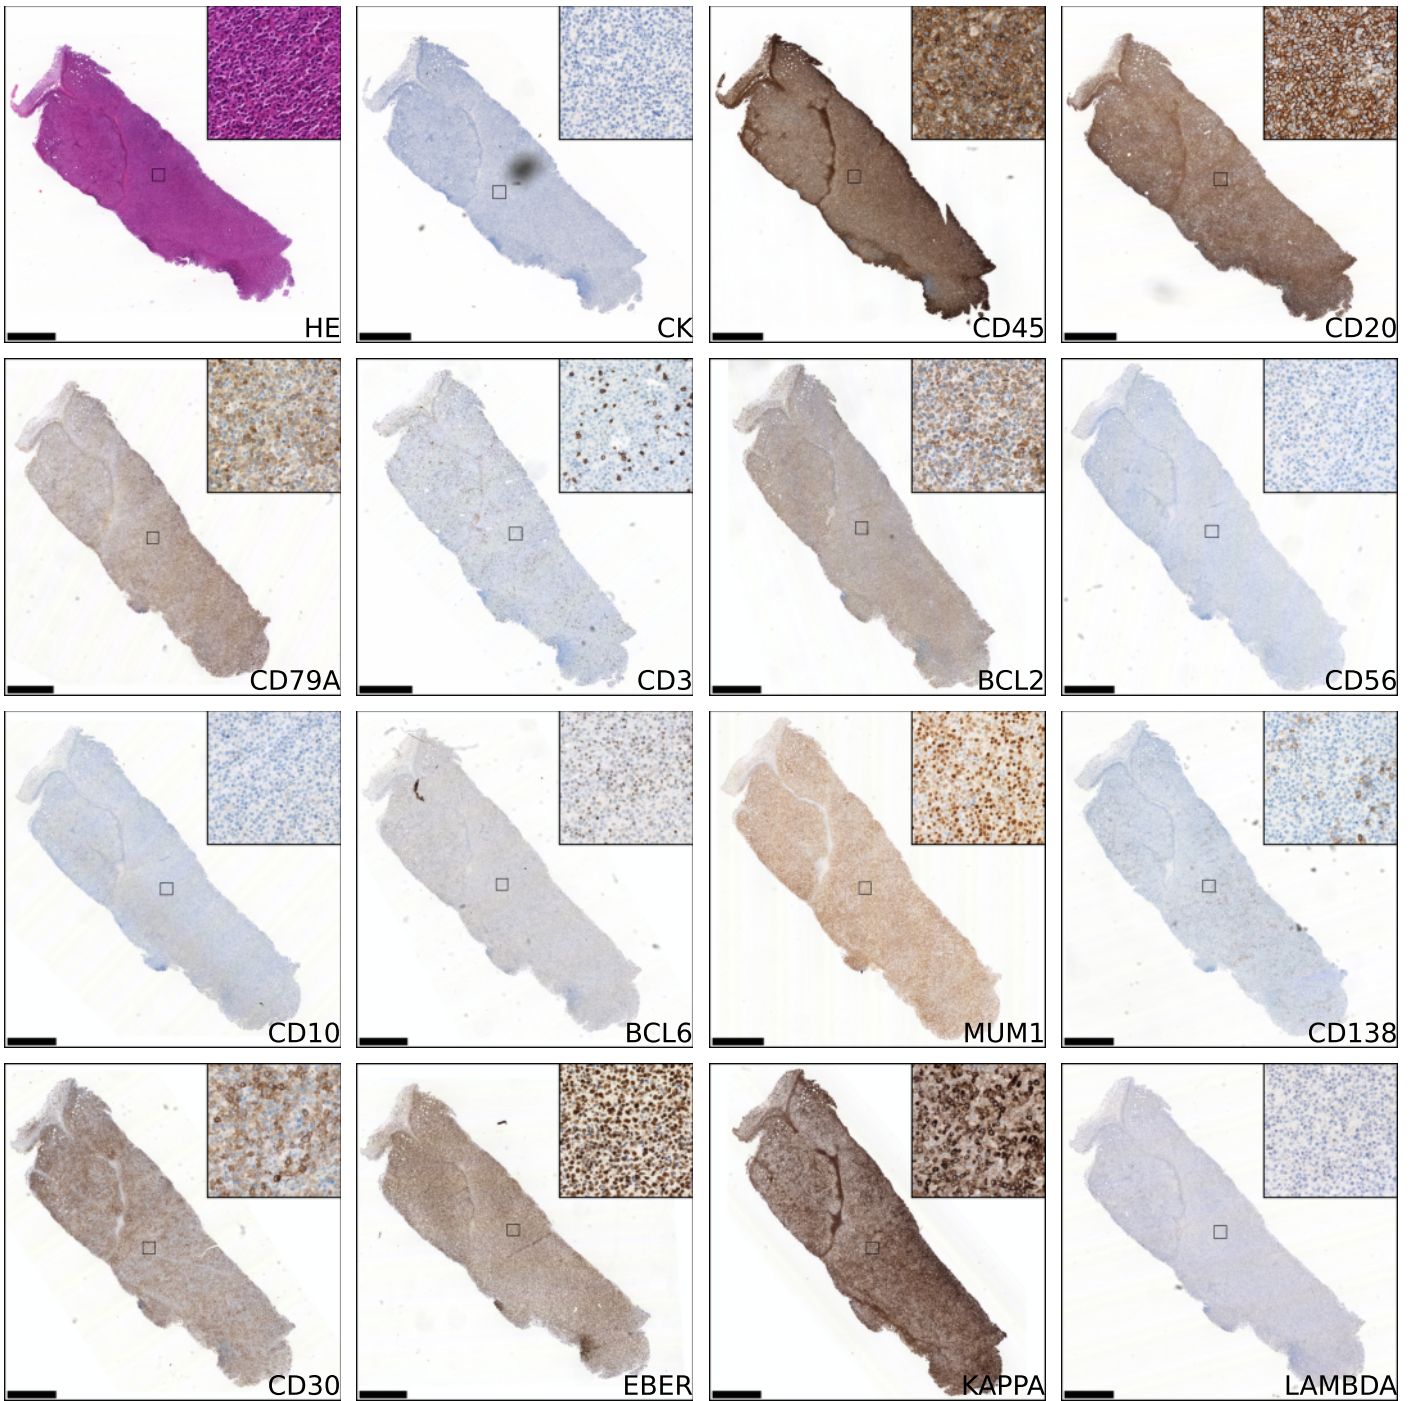



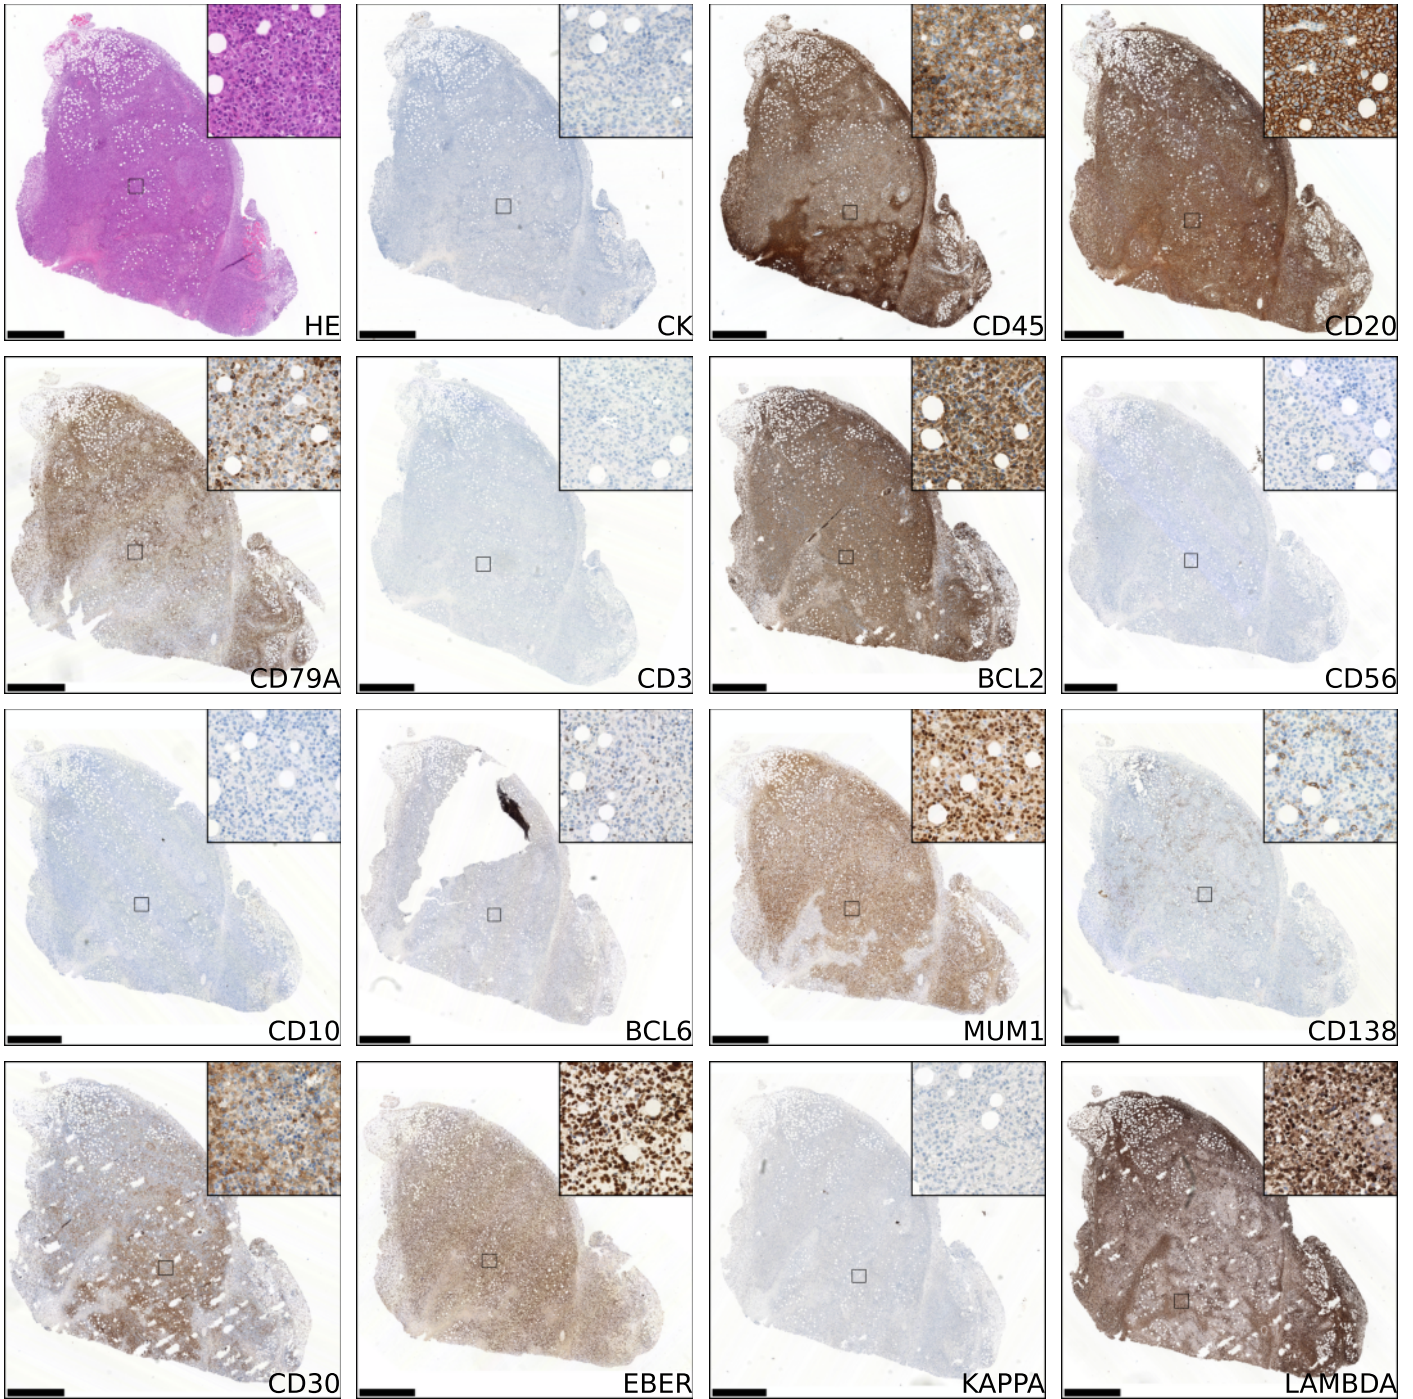



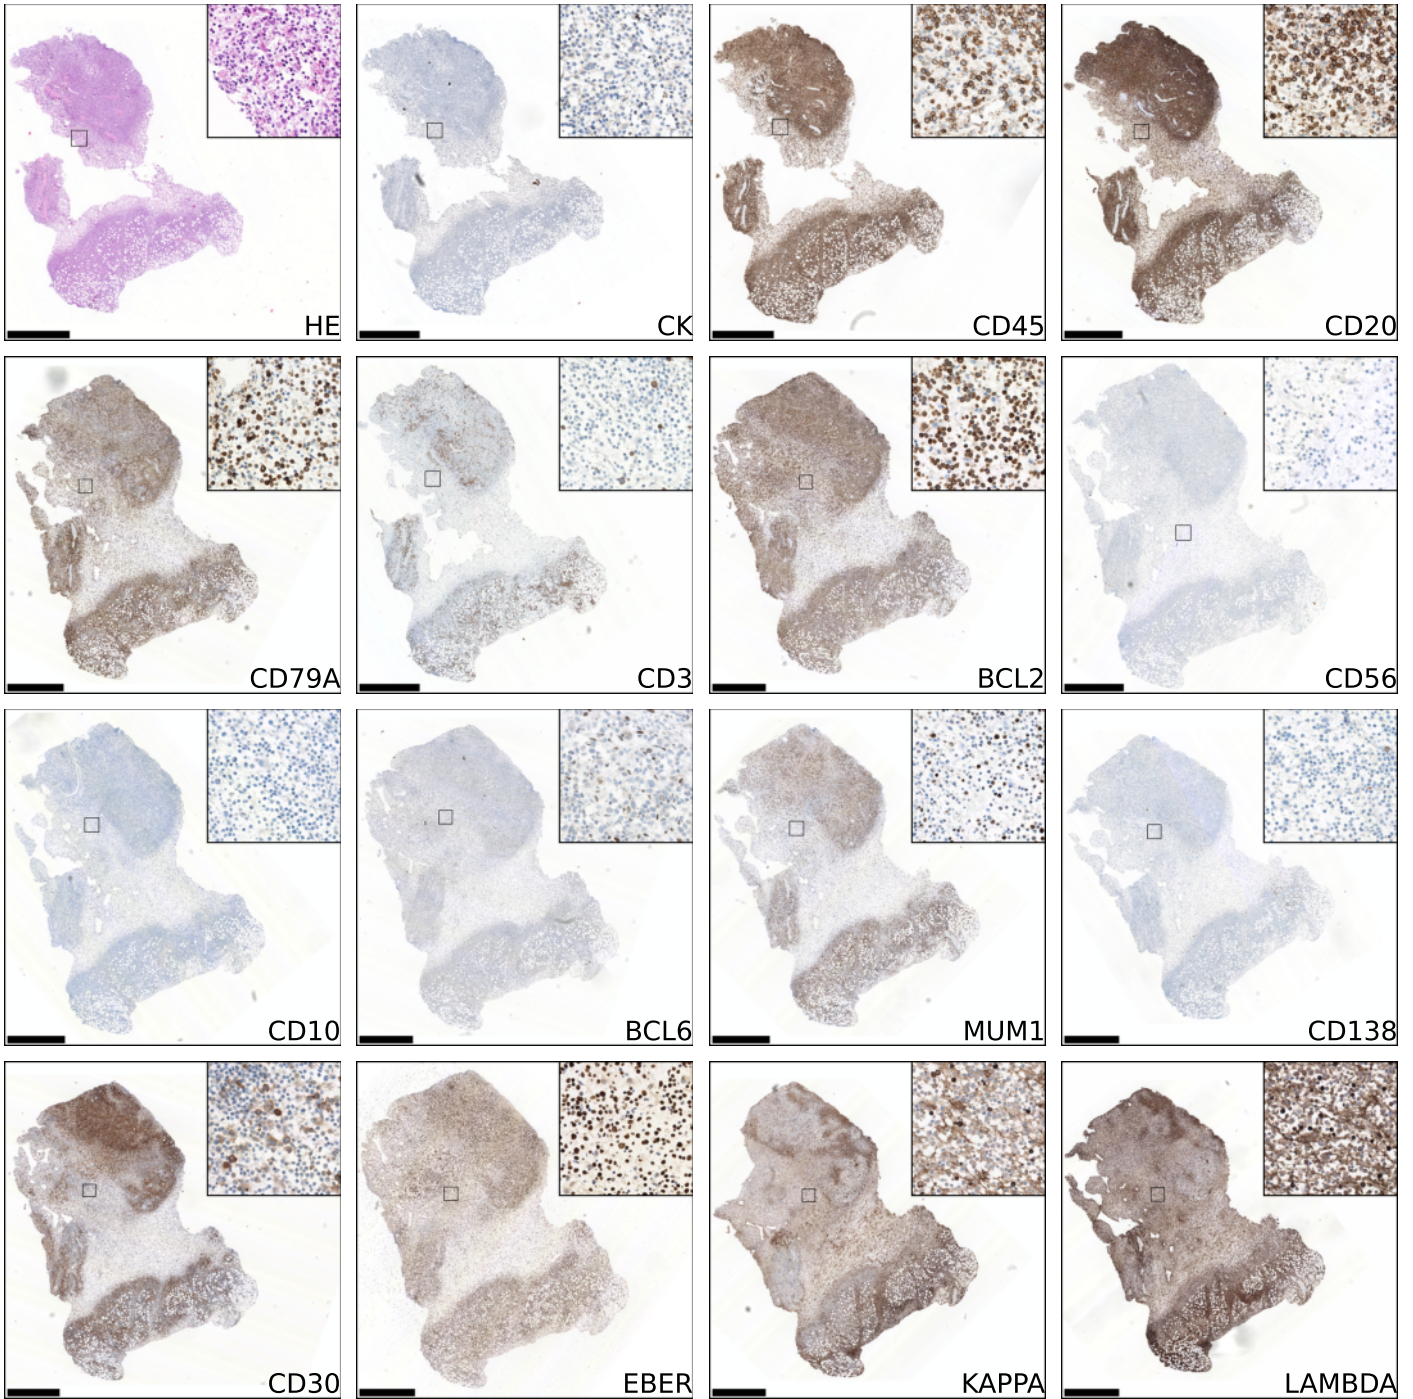



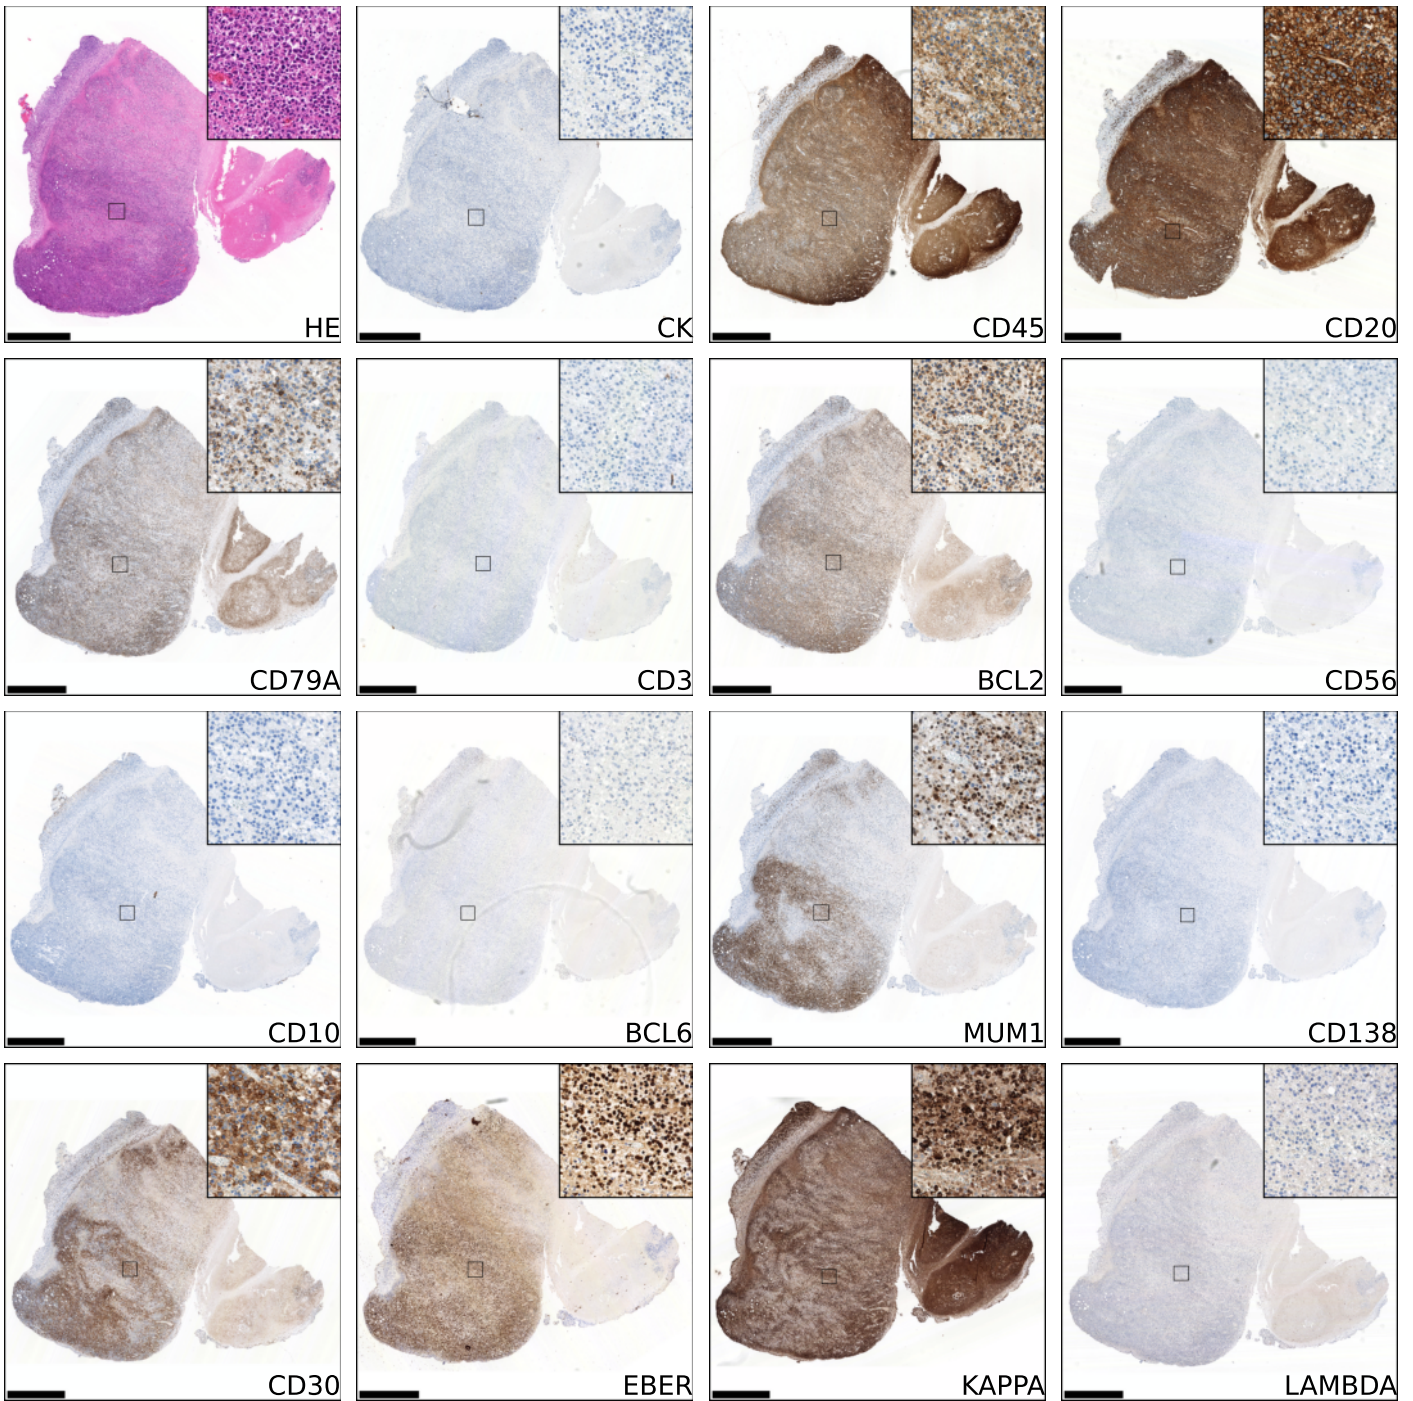



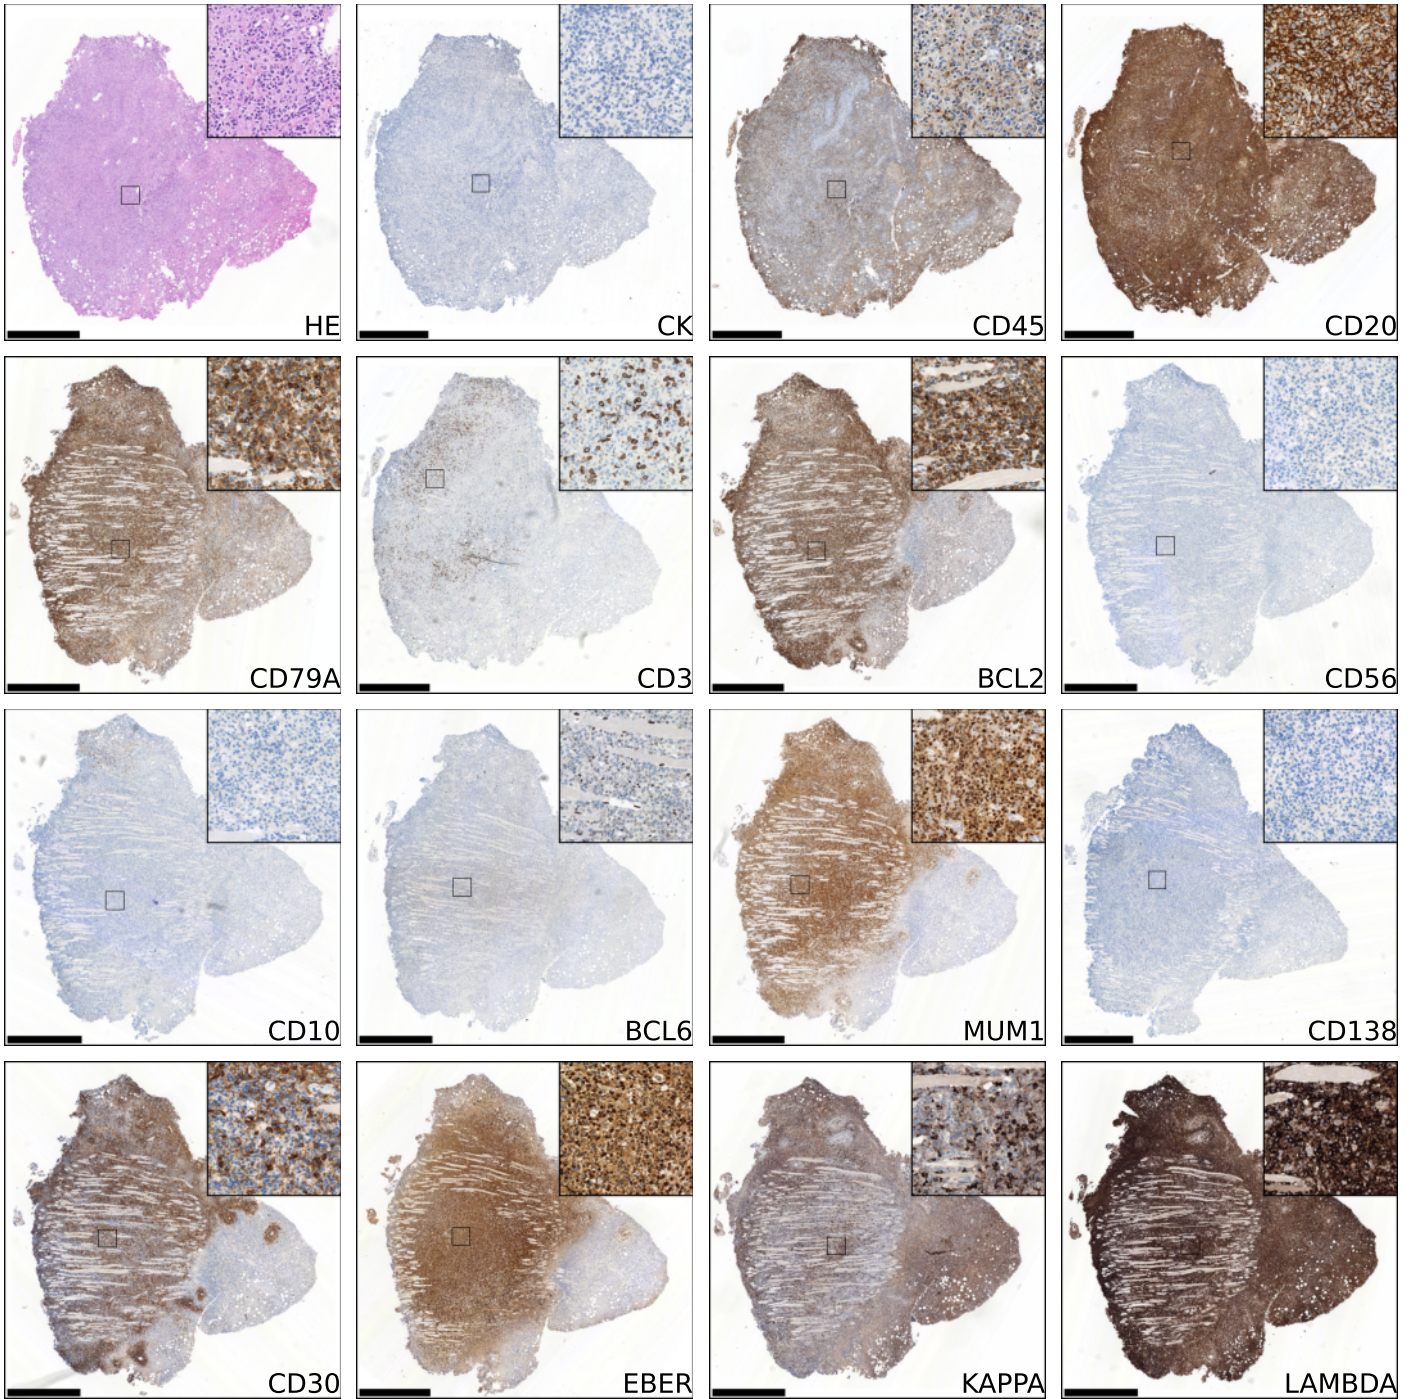



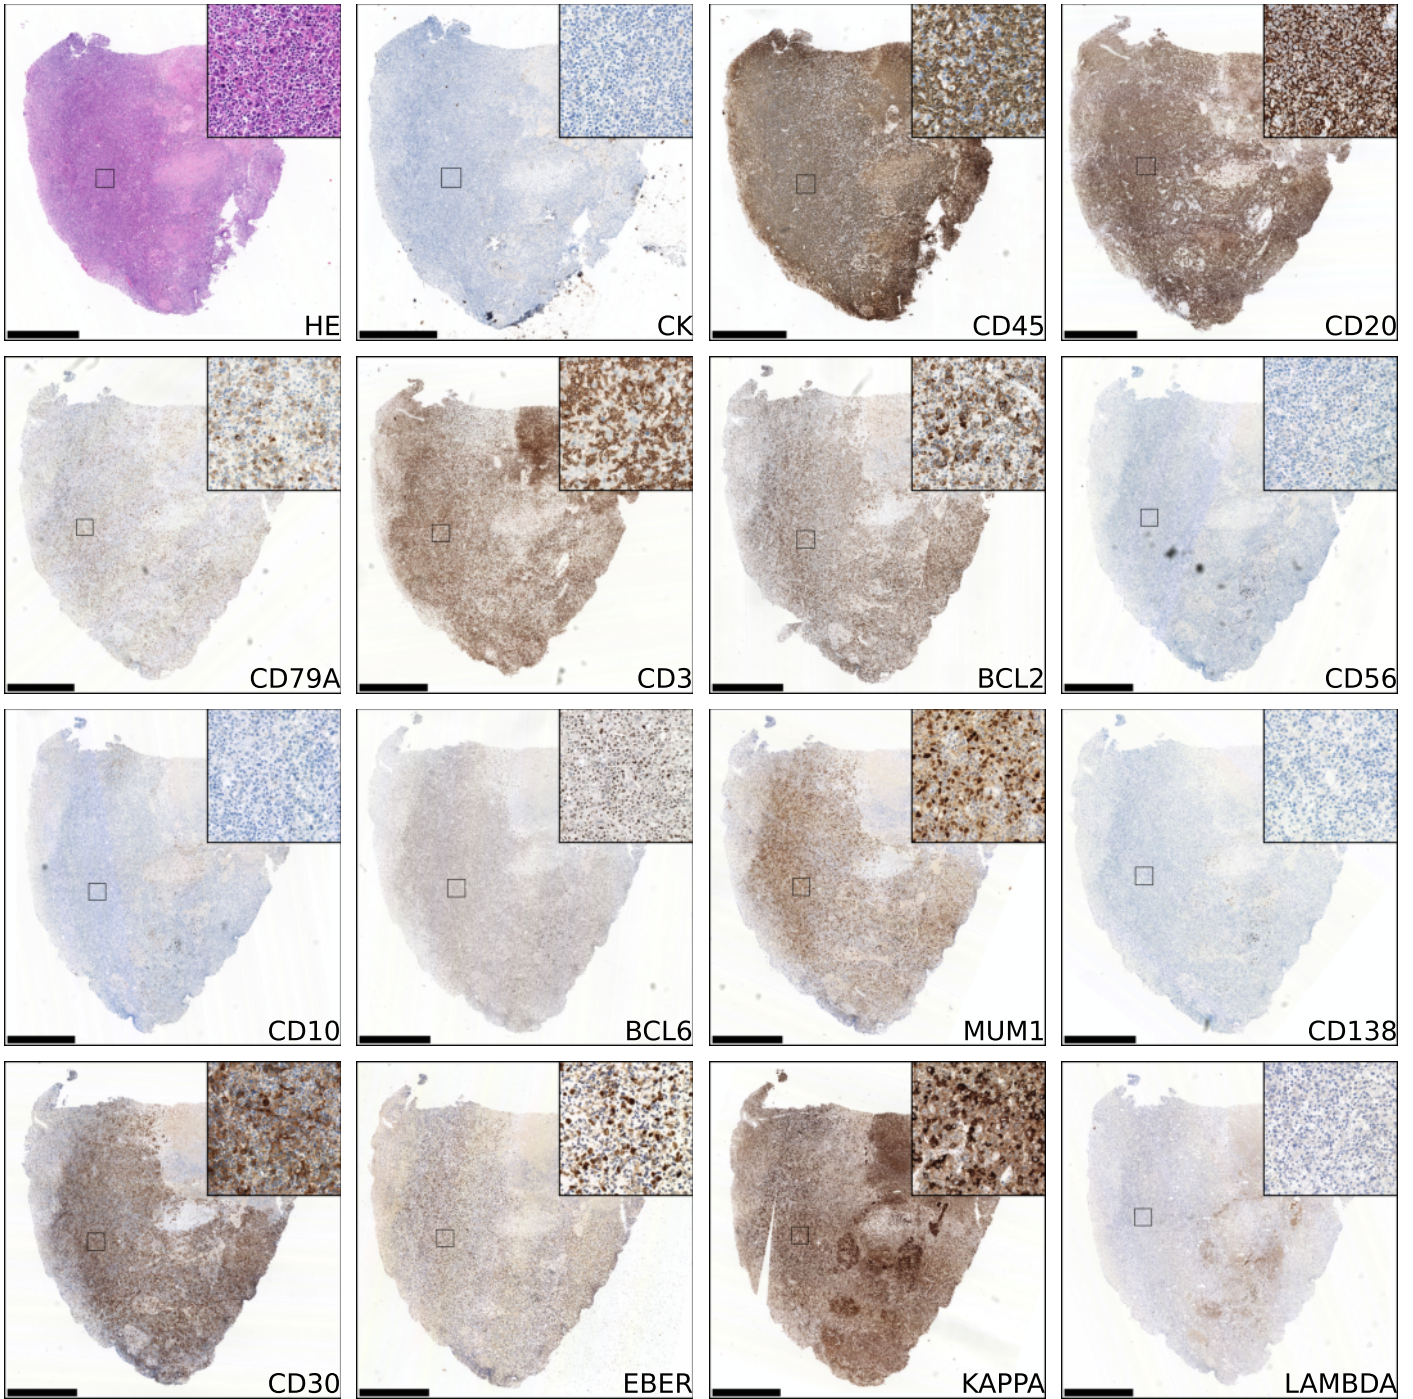



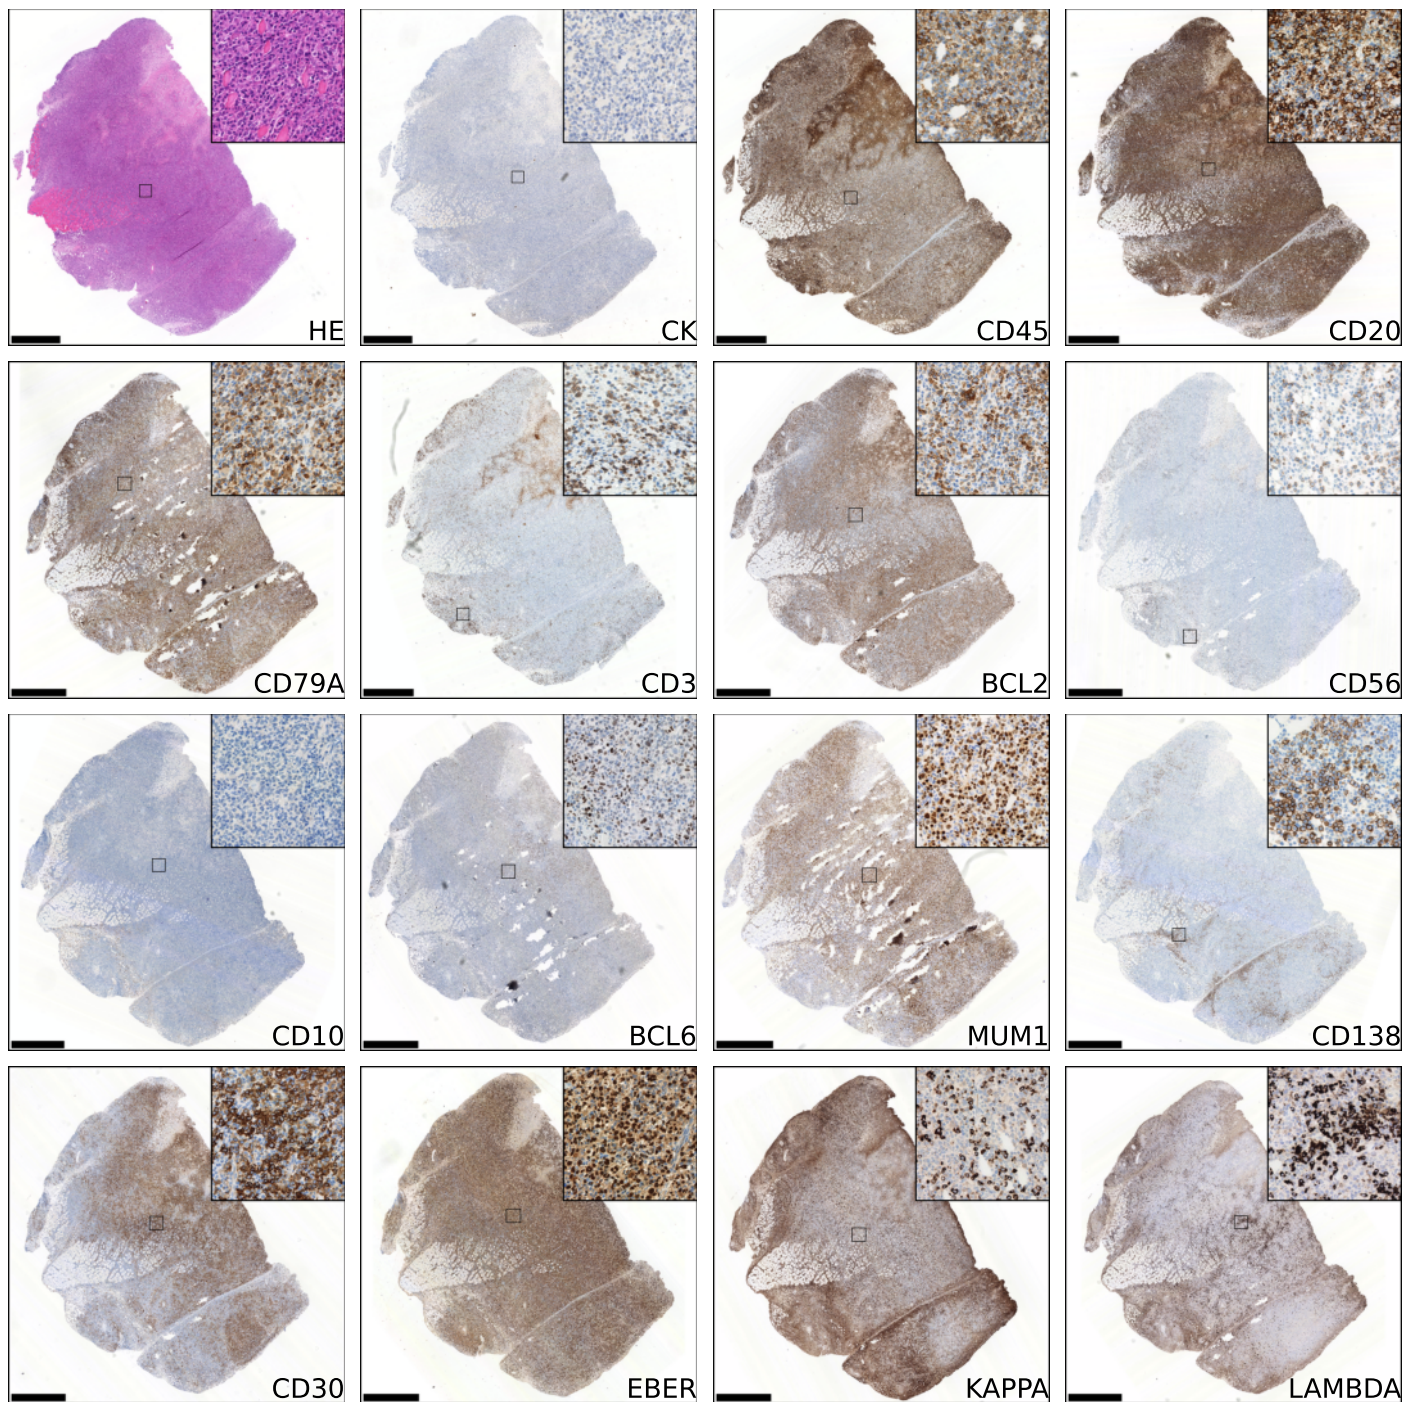



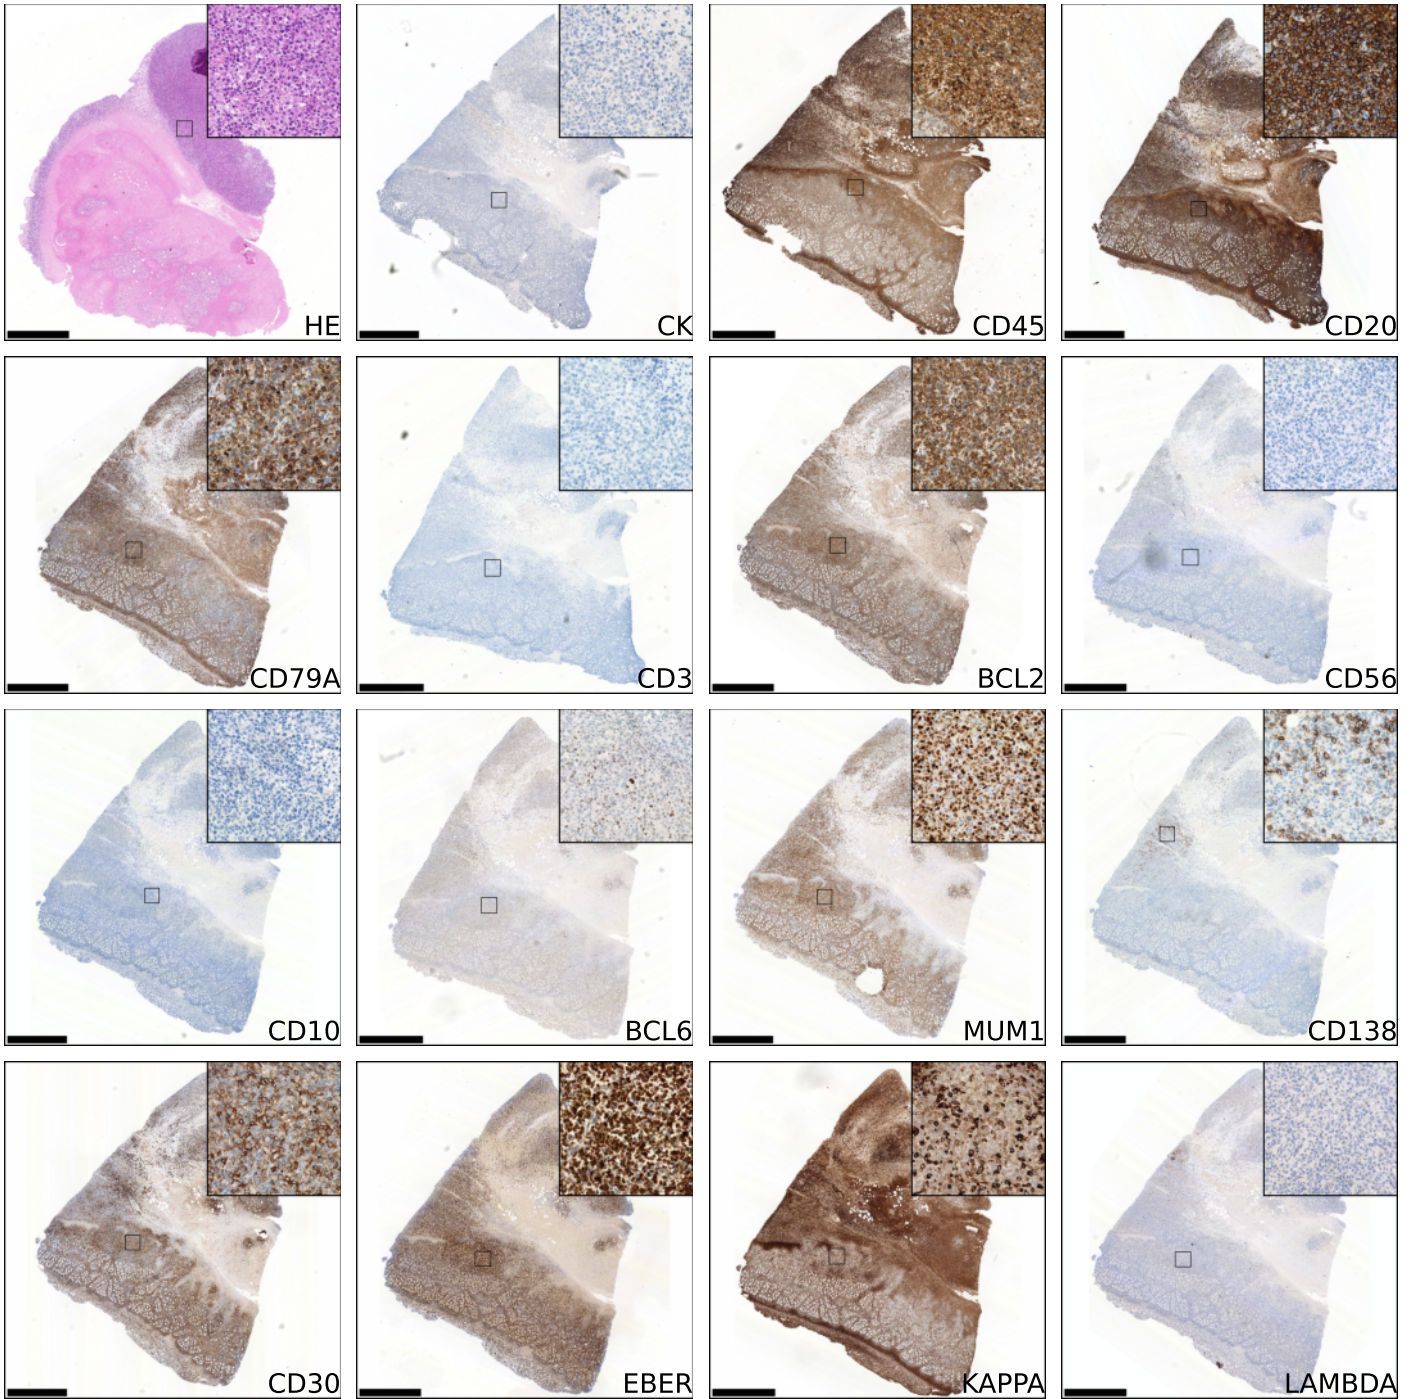



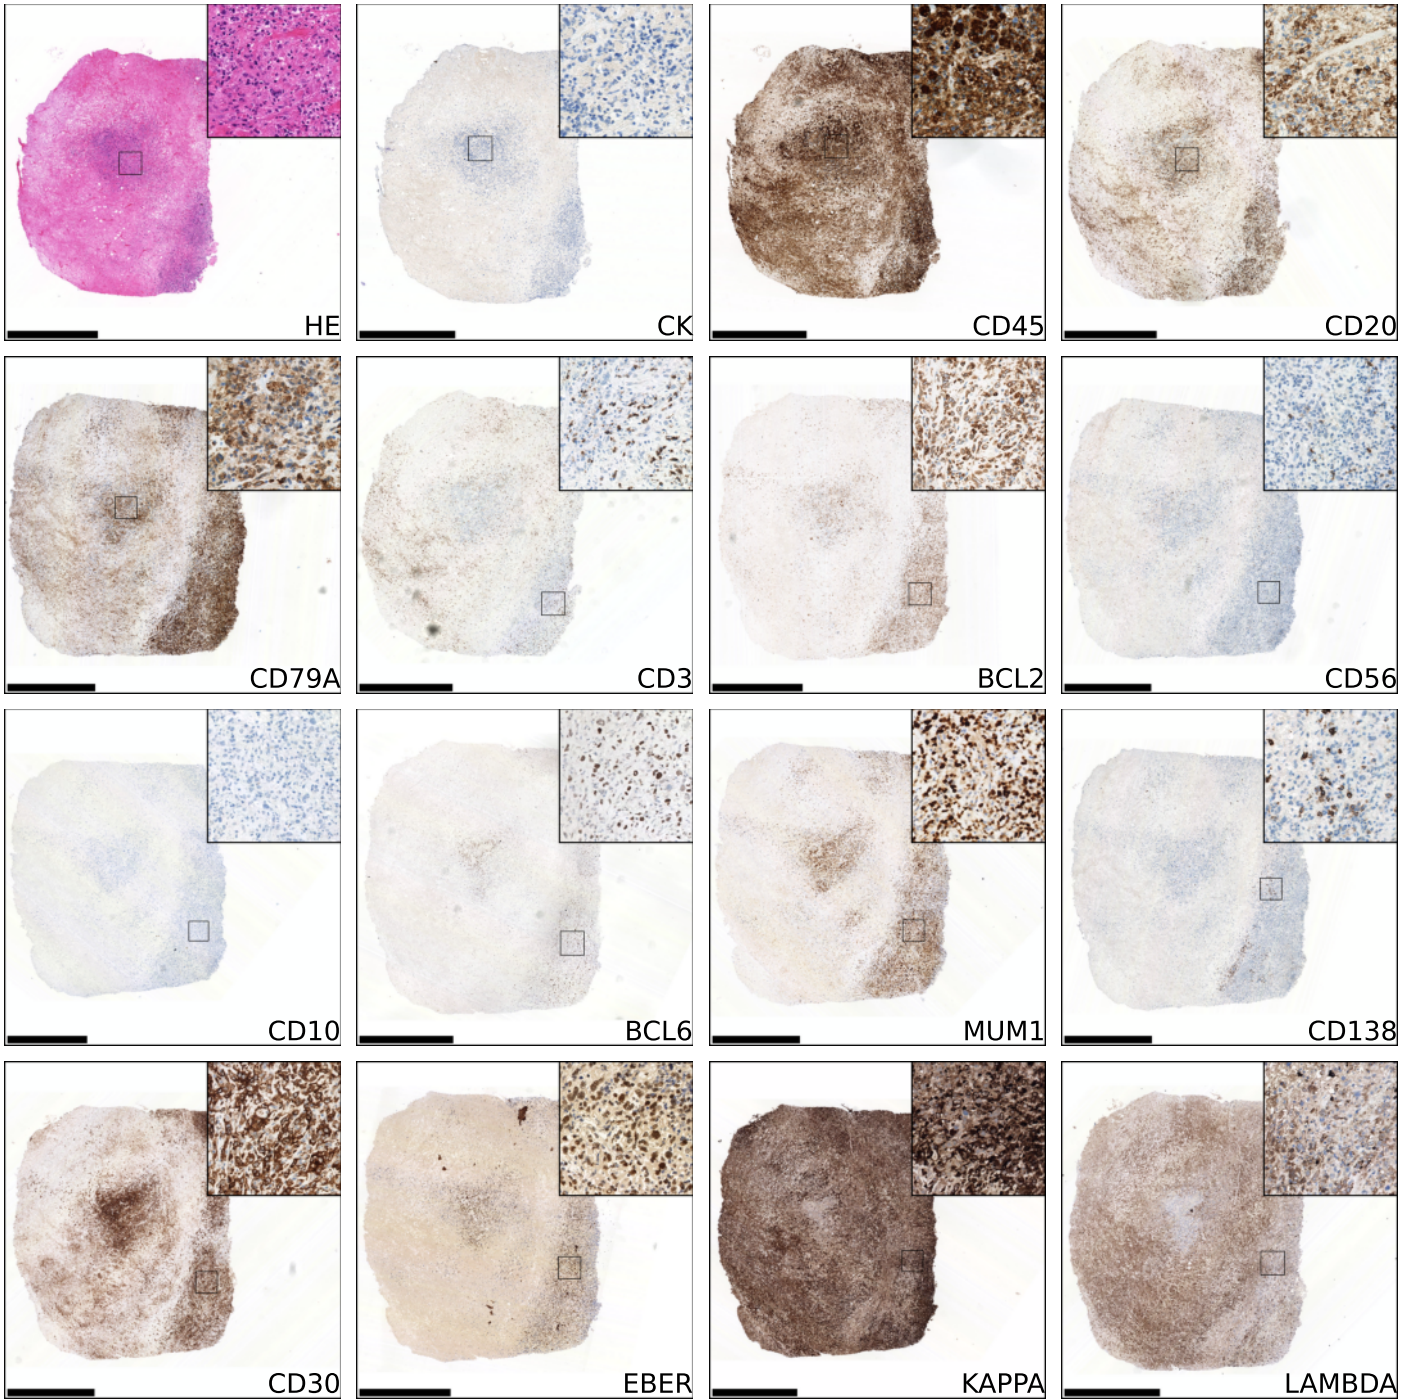



IHC outcome: Lymphoproliferation. Patient diagnosis: Squamous cell carcinoma.

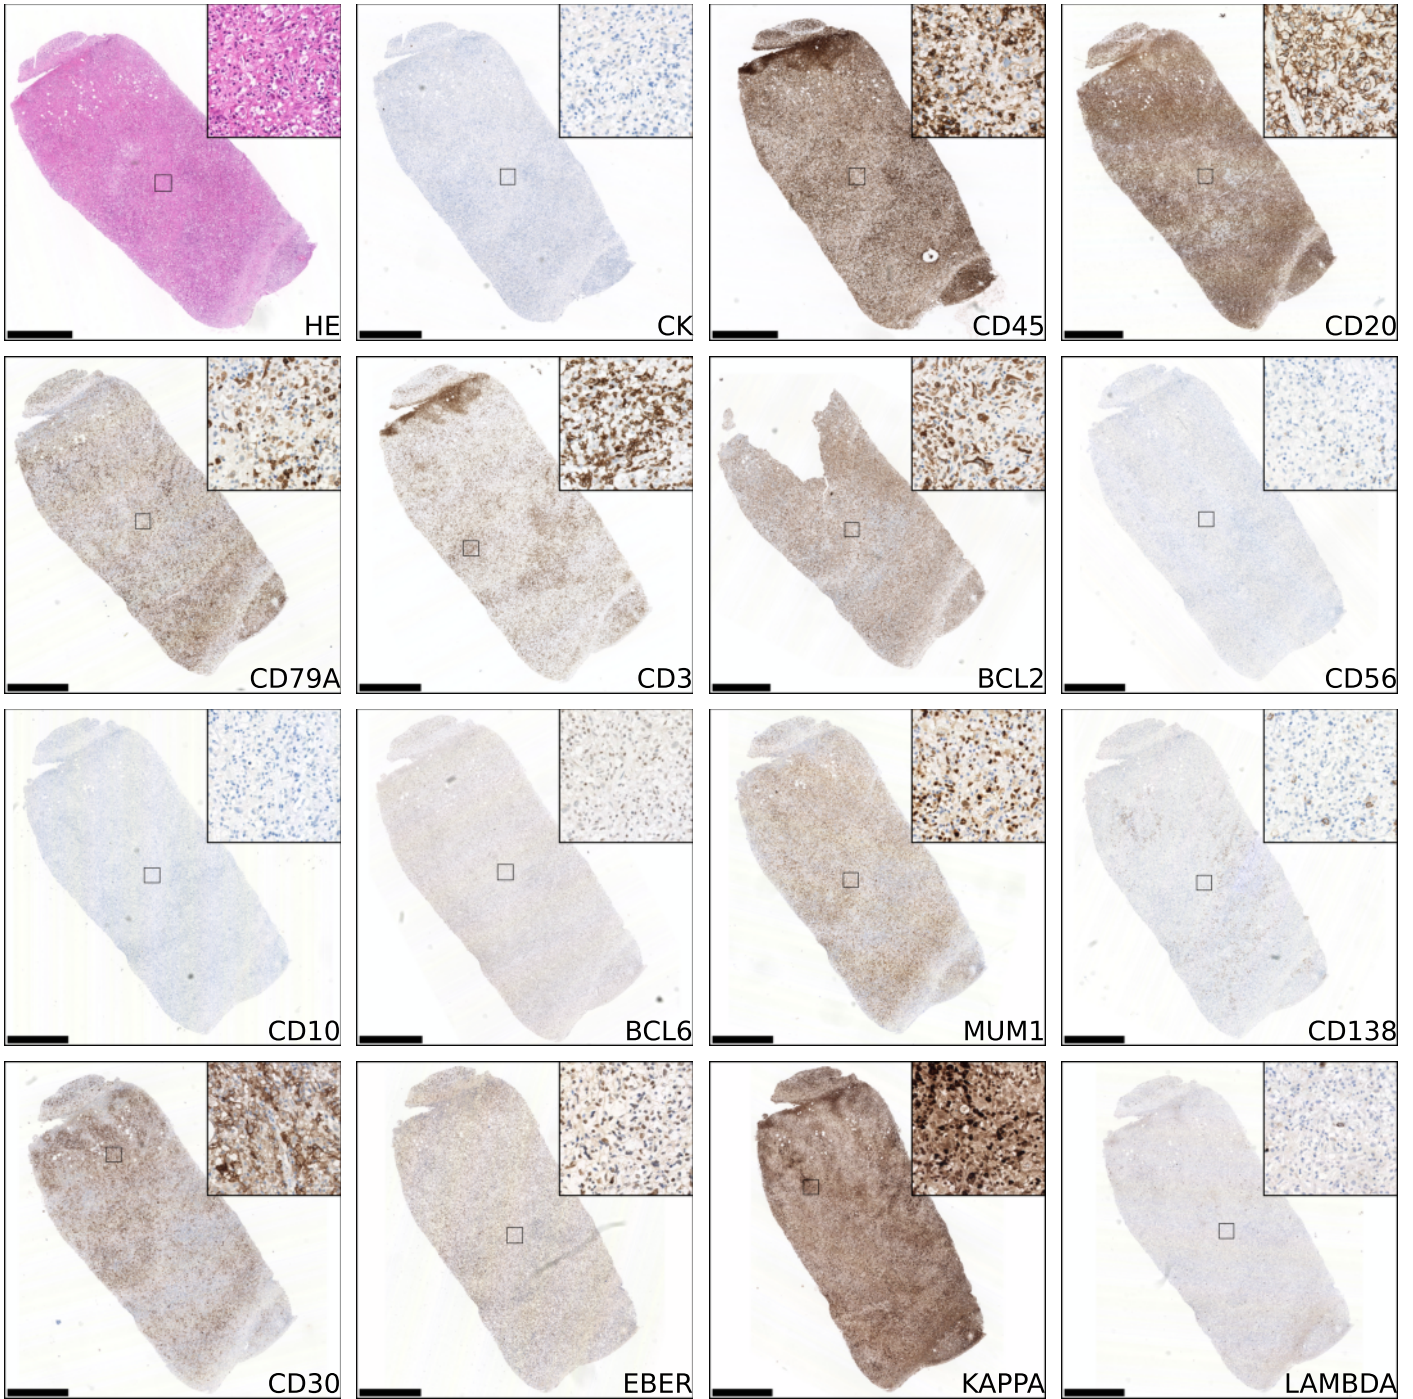



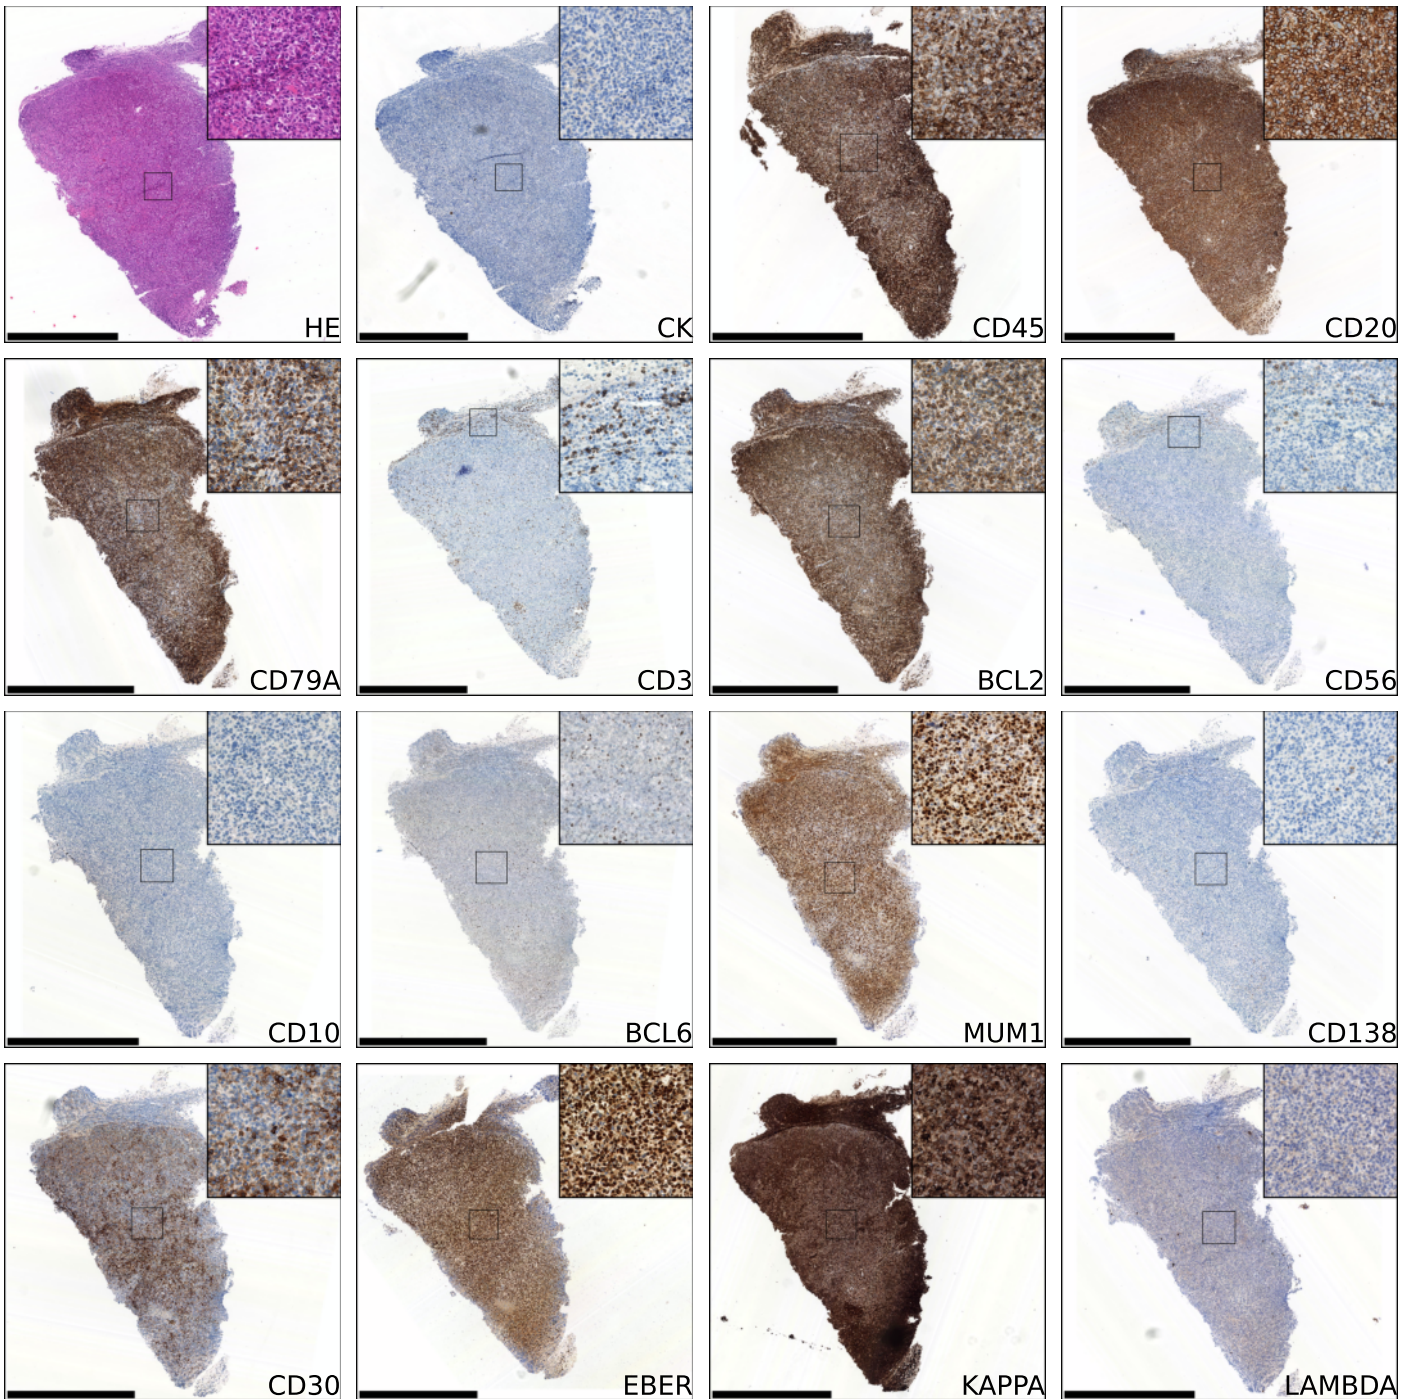



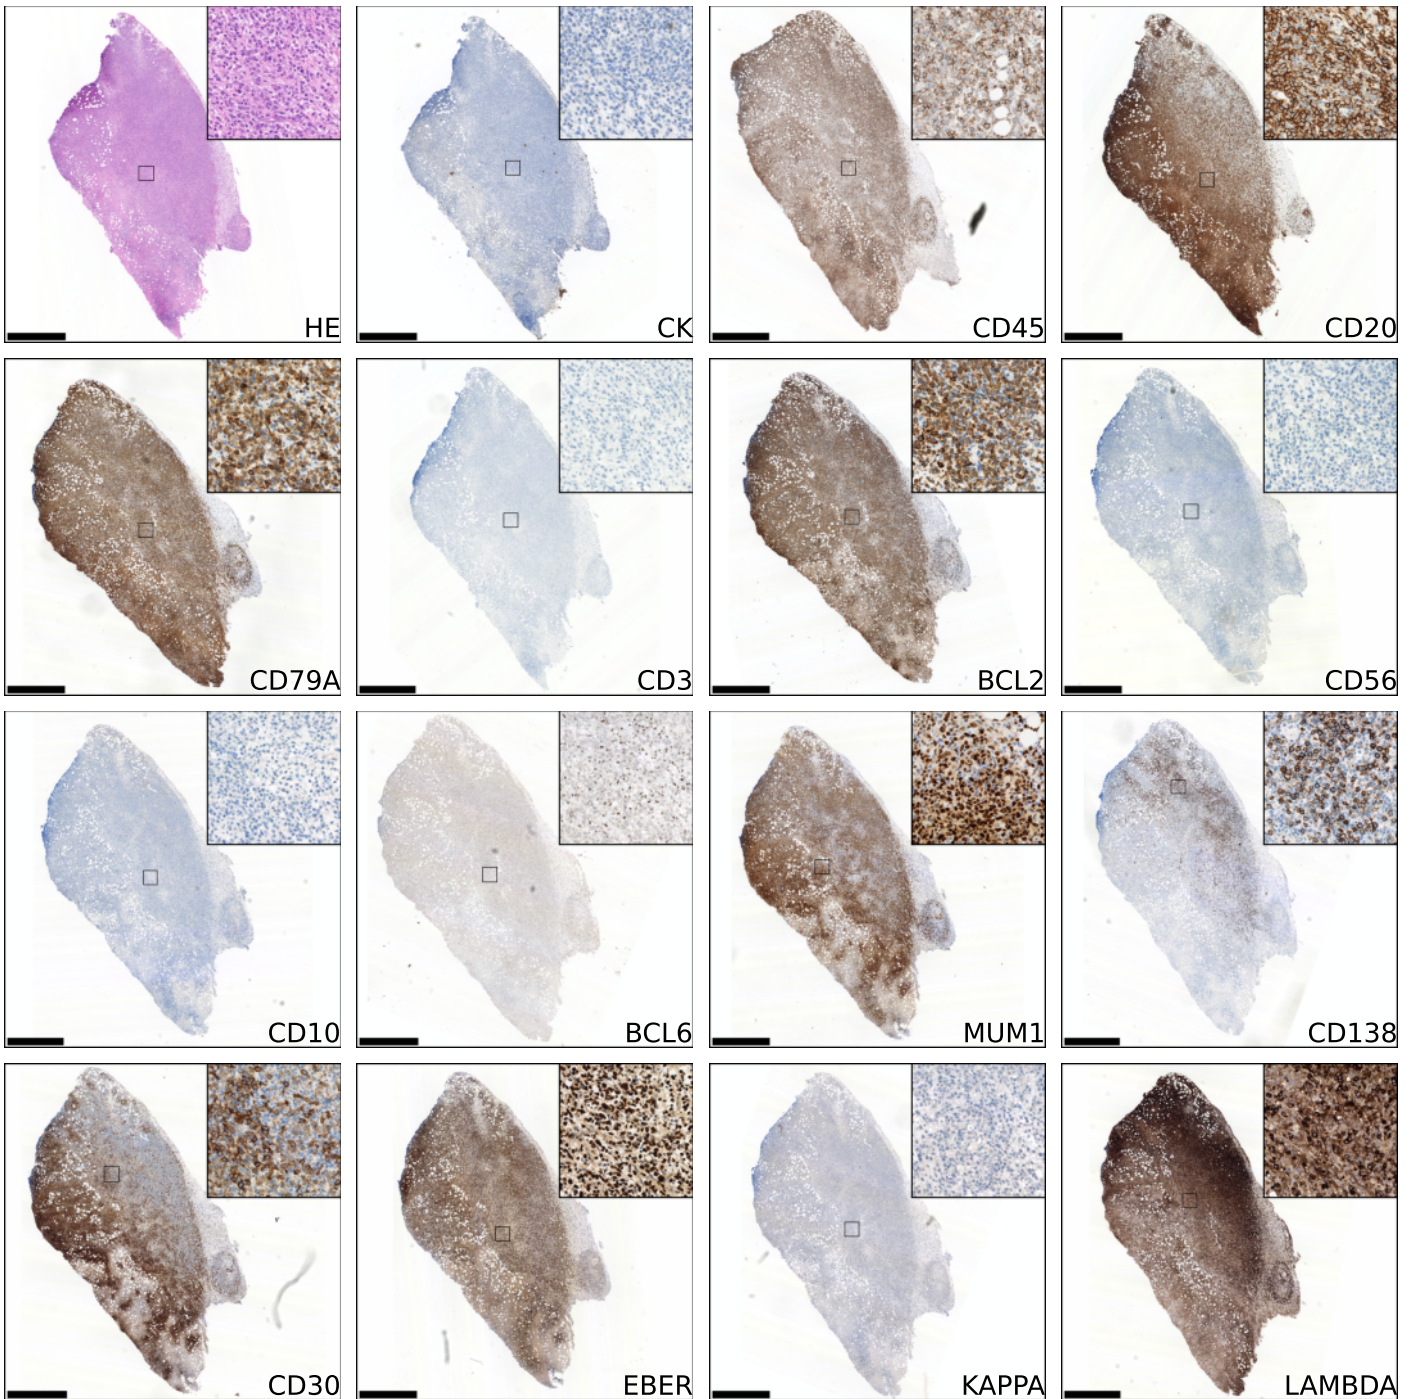

Supplement: DataSheet_1.pdf [file DataSheet_1.pdf]
